# Supplementary material
Source: publisher site journal article supplement (https://www.spandidos-publications.com/4601/downloadSupplementary)
Supplement: Supplementary file 1 [file downloadSupplementary]

## Sheet: Sheet1
Table SVI. Downregulated miRNAs
hsa-miR-30a-3p	hsa-miR-339-5p	hsa-miR-484	hsa-miR-361-5p	hsa-miR-106b-3p	hsa-miR-18a-5p	hsa-miR-200a-3p	hsa-miR-30b-5p
DST	ACTR1A	HSDL2	ARGLU1	MRPS21	ABTB2	ACO1	ABHD6
IGSF6	AKAP10	DBNDD2	ATPAF1	FAM218A	ADD3	ACOT7	ABI3BP
ITGA1	ALKBH1	TARBP2	BEND6	C11orf45	AEBP2	ADRB1	ABL1
CNPY2	ARHGAP29	CYB561D1	BTF3	GDNF	ALCAM	AGFG2	ACTC1
C9orf170	ARHGAP36	ARSD	C11orf44	ATP9B	AMIGO1	AKIRIN1	ACTN1
GNGT1	ARRDC3	SNN	CALM3	ZNF74	ASXL2	ALG2	ACTR3C
CEP19	BACE1	POLD4	CAMK2D	TMEM178A	ATP13A1	ANP32E	ACVR1
GNPDA2	BCL6	ZNF202	CAPN6	TRIM73	ATXN1L	APBB2	ADAM12
TNFSF13B	BEND3	TPT1	CCDC169-SOHLH2	ACAD8	ATXN2L	ARHGEF18	ADAM19
TMEM30C	BRMS1L	AL356356.1	CCDC178	ADAMTS13	BBX	ARL4A	ADAM9
RP11-321M21.3	C1QTNF2	NBPF8	CCDC58	MUL1	BEND3	ATF5	ADO
CTA-299D3.8	CDC25A	CCL3	CD177	C11orf96	BHLHE22	B3GNT2	ADRA1D
DNAJC2	CDK14	PROSER2	CDYL2	SIGLEC15	BMP2K	B3GNT5	ADRA2A
PAGE4	CERS4	MFRP	CENPBD1	THOC3	BRWD3	BAHD1	AKAP10
COLEC12	CNNM4	ACVR1B	CKS1B	RP11-422N16.3	BTG3	BCAP29	AMOTL2
INIP	CNOT6	NEUROD4	CLDN22	KCTD2	C5orf30	BHLHE40	ANKRA2
TEX37	COPZ1	SERPINF2	CPOX	FAM215A	C9orf114	BRD3	ANKRD17
CDKN1B	CYTH1	LAMB3	DCTN6	ELOVL5	CACNB3	BRI3BP	ANKS4B
ZNF138	DFFA	LYSMD1	DR1	RPS11	CADM2	BRMS1L	AP2A1
ARMC1	ELOVL2	CCL3L1	EXO5	AL591479.1	CAMK2N1	C16orf87	AP3S1
TTN	EMILIN2	CCL3L3	FADD	CCDC74A	CCND2	C1orf21	ARF4
SST	FAM167A	IFI35	FGF7	ACADS	CDC42	C21orf91	ARID4A
C20orf202	FAM98A	AC007375.1	FNBP1	PDGFA	CDK14	C6orf120	ARL15
SLN	FBXO30	PLCXD2	GNPTG	ZNF827	CDK19	CALCR	ARL4A
NUPL2	FHL1	MAMSTR	GOLGA4	MNT	CDK2	CBL	ARL6IP6
SLC25A33	GTF2I	ST6GAL1	GUCY1B3	LARP4B	CHRM2	CCDC6	ASB3
PTS	HNRNPA1	C8orf4	HELT	DNAH10OS	CLIP3	CCDC80	ATF1
CRYBB1	HNRNPK	IL21R	HMGB2	FAM19A1	CNTNAP1	CCND2	ATG5
SH3D19	IER5	SNRNP200	HSP90AA1	SERINC2	CREBL2	CCNE2	ATL2
BMX	KLF11	THUMPD2	ISCA2	TMEM110	CRIM1	CCNL2	ATP8A1
MRP63	LHX6	EP400NL	KCNJ3	PUF60	CSRNP3	CDC14A	AZIN1
AL138847.1	LSM14B	HERC2	KPNB1	IFI35	CTDSPL	CDC25B	B3GNT5
STAU1	LYVE1	TINF2	LAD1	RNFT2	CTGF	CDC42EP3	B4GALT6
FAM210B	MAP3K10	GUCD1	LUC7L	PRR18	DAAM2	CDK13	BCL2L11
RTP4	MMP15	IGBP1	LURAP1L	LAGE3	DDI2	CDK8	BCOR
GPR137C	MYO1C	TSPAN15	MTUS1	ARHGAP17	DIP2C	CFL2	BECN1
CDC14A	NIF3L1	HNF1A	MTX3	ZNF528	DIRAS2	CIAO1	BEND7
SLMO2	NNAT	GBX1	MYCBP	C1orf65	ENC1	CRIP2	BNC1
ERI1	NOVA1	CCL18	NFE2	FNBP1L	ERBB2	CRMP1	BTBD10
CCL7	NRXN1	GPR173	NKX6-1	TFAP2C	ERI1	CTNND2	C10orf11
PEX5L	PDZD4	BACH2	NR4A2	C20orf26	ESR1	DCP2	C10orf25
NPY2R	PEA15	SERTAD1	OGN	EPN3	ETV6	DCTN6	C4orf19
C2orf66	PHC1	LGALS16	PANX2	TAF3	EXPH5	DDX5	C7orf43
ZNF486	PLEKHH1	EMC6	PCNP	BTNL9	F3	DLC1	C8orf4
CTXN2	PLEKHH3	PREB	PKIA	PLD5	FAM196B	DMWD	C9orf72
HTR5A-AS1	PPAP2B	NMT2	POLR3G	PHB2	FAM229B	DNAJC13	CA10
ATRX	RBM27	C5orf49	RAB3GAP1	GIT1	FAM3C	DOCK4	CACHD1
TPK1	RHOF	FUT9	RAD23A	IDH2	FAM73A	DR1	CALB2
SH2D3A	RNASE7	PKD2L1	RCAN2	FEZF2	FBXL3	DSTYK	CALCR
SDHAF2	SCAMP2	C3orf62	RCHY1	RBMS1	FCHSD2	EDEM1	CALU
MAP1LC3B	SERTAD1	CDKN2A	RNF4	NTNG1	FER	ELAVL2	CAMK2D
HIST1H2BF	SERTAD4	PRM1	RQCD1	OSBPL3	FNDC3B	ELK3	CAMK2N1
NUDT9	SLA	GJD4	RRAGB	EDF1	FOXH1	ELMOD1	CAMK2N2
C14orf1	SLC4A10	IL6R	RWDD1	VAT1	FRS2	ENPP5	CAPN5
CCNT2	SLX4IP	BSCL2	SC5D	JAM2	FRYL	EPGN	CAPZA1
C1orf112	STOX2	CCKBR	SCAF8	ZNF627	GCLC	EPHA2	CARF
HMGN4	SYNRG	GLDN	SERTM1	GULP1	GIGYF1	EPHA7	CARS
AC020907.1	TLE3	PHYKPL	SLC7A6OS	LINC00923	GMPR	EPN1	CAT
CPA6	TMEM119	CLEC6A	SOHLH2	DISC1	GTF2A1	ERC2	CBX2
THOC2	TMEM178B	LAMTOR1	STX7	DPT	HCFC2	ERG	CBX3
IFT20	TMEM183A	UPF3A	TKTL2	CENPBD1	HEATR5A	EXOC7	CCDC117
MARC1	TMEM79	ORC3	TXNDC2	HIST1H3E	HIF1A	FAM118B	CCDC148
APOBEC3A	TSPAN9	MIS12	UBE2K	KLF13	HIF1AN	FAM184B	CCDC178
SCAF4	USF2	DCAF4	VEGFA	AP4S1	HMBOX1	FAM188A	CCDC43
IL1B	VCP	FAM46B	WNT7A	AKR1C2	HMG20B	FAM220A	CCDC71L
CALCB	VNN3	LGI4	WT1	HOXD9	HMGCS1	FBXL2	CCNE2
GOLM1	ZDHHC22	F2RL3	ZBTB18	ISY1-RAB43	HRK	FGFR1OP	CCNK
FGF5	ZNF385B	ARL10	ZNF24	B4GALT6	HSF2	FKBP5	CCNT2
CCDC112	ZNF689	ZNF785	LMBR1	KRT23	HSF5	FOXA1	CCNY
ERGIC2	C6orf223	MLN	MDM4	KCNJ3	IGF1	FOXA2	CDC37L1
C8orf44	PFKFB3	NSDHL	ELOVL7	MRM1	IGF2BP2	FOXC1	CDCA7
UQCR11	ANKRD52	GRAMD1C	VAPB	DHRS12	INADL	FOXJ3	CELF3
GTPBP4	PHLDA3	SLC26A10	HOMER1	ATP2B3	INO80D	FUS	CELF4
B3GNT5	LEPRE1	PSAPL1	SLC25A21-AS1	ADRM1	IRF2	GAB1	CEP76
DNAJB14	SNX27	HOXA5	ELF5	TATDN2	JAKMIP3	GATA6	CFDP1
C3orf38	SCAMP5	SH3PXD2A	TMEM56	NUTM2B	KCNA1	GLRX	CFL2
GLT8D2	P2RY2	FAM154A	ZMAT3	TMEM241	KCNA2	GNA13	CHD1
PSMD10	PTP4A1	TOMM5	FSD2	UBAC2	KCND3	GNAI1	CHL1
CNOT8	NF2	TXNRD3	GPR63	AC127496.1	KCNH7	GNPTG	CHST1
SLC24A5	ZNF275	NGRN	ST6GALNAC5	NUTM2A	KCNJ2	GPC2	CHST2
OR2L13	KIRREL	RFC5	DYNC1LI2	C15orf26	KDM5B	GPR12	CNTN4
AGPAT1	ANKRD65	C9orf62	PIK3R1	TRIM58	KIT	GPR137C	COL13A1
LINC00998	HOXA11	CYB5A	PERP	C19orf43	KLHL15	GPR6	COL25A1
YTHDF3	MTMR3	MED8	FUT9	KPNA6	KLHL20	GRB2	COL9A3
ADA	ABL2	MAB21L3	IL13RA1	ZNF512B	KPNA6	GSG1	CPNE8
ICOS	LPHN1	DLX2	RAD23B	AHCTF1	LAT	HCAR2	CPOX
COCH	CASD1	SERINC5	PDK4	RRAD	LIF	HCAR3	CSAD
MRPL16	SLC22A17	IPO11	MET	SLC35A1	LIN54	HCN1	CSNK1A1
ITGB8	AMIGO1	ARL15	CDK19	PON2	LMO4	HECTD1	CTHRC1
ZNHIT6	NRP2	KRT34	ZBTB40	ADORA1	LSM14B	HGF	CUL2
RAB28	EPHA4	ETNK2	CISH	RNGTT	MANEAL	HIAT1	CYB561
IL33	GPR62	ATP6V1D	ST8SIA1	C12orf79	MAP3K1	HMG20A	CYP24A1
CLDN14	RNF169	GIMAP6	PARP11	TGM3	MAP7D1	HMGCS1	CYSLTR1
GREM1	CELF6	MYCBP2	VEGFB	FAM196A	MAPK1IP1L	HNRNPF	CYYR1
RGS7BP	FOSL2	C16orf59	IL10	PTP4A1	MAPK4	HOXA11	DBF4
AC008267.1	TNPO3	VEGFB	GPR180	APBB3	MBNL1	HOXC13	DCBLD1
APC	USP8	YTHDF3	SLC41A1	ELF2	MBOAT2	IKZF2	DDAH1
GNPNAT1	VPS4A	ANKAR	ERG	GCDH	MDGA1	IPO5	DDIT4
GJB6	C21orf59	TNFRSF1A	ADCY2	ATPAF2	MESP1	IQCJ-SCHIP1	DESI2
DNAJC19	VAT1	SIT1	BDP1	COX19	MYLK	IRS2	DEXI
NDC1	GEMIN6	SDHAF1	CNGB3	C12orf52	NAA50	KCNJ2	DGKZ
HLA-B	YWHAZ	TNNI2	TFAP2B	FAM167A	NACC1	KEAP1	DIP2B
EIF1	NFIB	TRIM74	CDS1	LPL	NCOA1	KHDRBS2	DLGAP1
UNC13C	PDE4D	CSRNP1	MXI1	VSX2	NEDD4	KIAA0408	DLGAP2
YEATS4	NACC1	TRIM11	SND1	GGA2	NEDD9	KIF17	DLL4
AC027307.3	ERI3	CCNL1	CALCRL	PFKP	NR1H2	LAMTOR3	DNAJC13
RFK	ZBTB8A	MAP10	TRAF3	PPAT	NR3C1	LETM2	DNAJC25
PDK1	ZBTB16	MMP28	CLDN8	KAAG1	NXT2	LHX1	DNAJC25-GNG10
CCDC74B	UBE3A	PLCZ1	RHOA	SF3B5	OLFML2B	LPAR3	DNMT3A
WDR44	KMT2A	RGS11	VWDE	DLGAP4	ONECUT3	LPGAT1	DOC2A
SETDB2	CTIF	SARS	ZBTB10	CTD-2207O23.12	ORAI3	LUZP6	DOCK7
C1orf222	BTBD9	VNN2	LPCAT1	UBXN10	OTX1	LYPLA1	DOLPP1
WFDC8	ICOSLG	DGCR2	BMPR2	PAPD7	PARD6B	MAGED4	E2F7
UBE2G1	FBXO28	MYEOV2	SMIM14	CCNE1	PDE1B	MAGED4B	EAF1
FAM35A	FLT1	FOXH1	ARCN1	ZNF257	PDE4D	MAP2K4	EDEM3
MTHFD1L	CCDC113	C19orf10	CCNY	SPATA18	PDGFC	MAP2K7	EDNRA
CYP7A1	DAAM2	COL8A1	C16orf87	ENPP4	PHF19	MAP7D1	EED
RAB33B	APBA1	USP18	AJAP1	SH2D4B	PHF2	MARCH7	EFR3A
LRRIQ4	NFE2L1	AMICA1	UBA6	HIST2H2BE	PLEKHA6	MBNL1	ELAVL2
CCDC67	AC137932.1	DKK2	ZNF516	MFSD12	PRDM6	MDM1	ELAVL4
ZP1	ONECUT2	AL450307.1	SLC24A2	MARVELD3	PRKACB	MNX1	ELMOD2
EOGT	PRUNE2	GSTM5	B4GALT6	ATOH1	PSD3	MSANTD4	ELOVL5
ID1	UNC5C	IL20RB	P4HA2	SLC32A1	PTGFRN	MYBL1	ENTHD2
USP6NL	TRPC3	HHIPL2	BCORL1	MTSS1L	PTP4A3	MYRIP	EPB41
DLX5	ZBTB43	CPSF4	SNAP25	REL	RAB11FIP2	MYT1L	EPC1
HIRA	CLPB	TSPAN3	AC010327.2	SLC16A10	RAB22A	NAP1L4	EPC2
ENO4	PODXL	FBXO31	GPR155	IGFBP3	RAB5C	NDFIP2	EPG5
AL645728.1	SLC6A4	SERF1B	ERC2	LY6E	RAB9A	NDNF	ERG
GFPT1	ZBED4	SERF1A	C10orf128	DTX2	RABGAP1	NIPAL3	ERLIN1
NOX3	MMP24	NAT14	TWIST1	ZNF182	RASA2	NME1	ESCO1
RDH14	SHISA7	KIAA1033	EHF	ANKRD49	RBBP8	NUDCD1	EVX2
RP11-1102P16.1	TNRC6C	C19orf18	CCDC30	ELOVL2	RNF145	OLIG3	EXTL2
ALS2CR12	TMEM170B	ZNF233	SLC6A5	SLA2	RNF146	OSBPL11	FAM104A
PTPLAD1	RORB	DIO3	ZBTB8B	CCM2	ROMO1	P2RY1	FAM109B
TMEM106B	AKIRIN1	SLC6A1	NFIX	OLFM1	RORA	PANK3	FAM110B
C21orf62	LDLRAD3	GALNT6	BDNF	SLK	RUNX1	PAQR9	FAM133A
SPG20OS	BCL2L11	HIAT1	PKP4	CYP4F11	SH3BP4	PCNXL4	FAM13C
LYRM2	CHD1	CORO6	KLHL7	BCL2L10	SIX3	PEX5	FAM214A
C6orf211	MDGA1	GNA14	PABPC4L	MORN3	SLC50A1	PFKM	FAM43A
CCDC126	IGF2BP1	PIF1	PTPRG	C5orf20	SMAD2	PGRMC2	FAM46A
CEP152	ZBTB8B	SEMA4D	SHOC2	ATP6V0B	SMAP2	PHYHIPL	FAM49A
CTB-186H2.3	THRA	SLC52A2	SDK1	ATF5	SMARCC2	PIGW	FAM73B
IARS2	FRS2	TMIGD2	CPSF7	VAT1L	SOCS5	PITX2	FAM81A
PSIP1	PURB	CACNA1E	ZFPM2	SLC1A7	SORBS2	PLCL1	FAM91A1
CXCL11	PHF8	NDST1	CSTF1	CD99L2	SPIN1	PLEK	FANCF
UNG	UBN2	C9orf24	FOXM1	TEAD1	STAM2	PTP4A1	FAP
DAW1	ZNRF2	CCDC42	KANSL1L	F12	STK4	PTPRG	FBXL14
KHDRBS2	RGP1	EMX1	OTUD4	GPX1	SUCO	RAB38	FBXO45
CHCHD3	SLC44A1	NUP62	POLR2M	BTBD3	SYNCRIP	RANBP6	FGF20
HSDL1	LANCL3	RELA	MAP3K9	GATAD2A	TAL2	RARB	FKBP3
TMEM99	JHDM1D	RNF24	ASB11	TBC1D10C	TBPL1	RBM7	FOSL2
RPAP3	PURG	COG2	PHAX	KIF3B	TEX2	REEP3	FOXB1
FAM134B	MED1	SGSM2	GPR75	CNTNAP2	THBD	RHEB	FOXD1
GPR1	WIPF3	TLX1	CTDSPL2	SH3GL3	THBS1	RNF11	FOXG1
CT47A12	NEDD4L	IER5L	DPP10	C1QL2	TLL1	RNF145	FRZB
CT47A5	PLD1	CMTM5	GRIP1	PAK3	TLL2	RNF185	FUCA1
HIST1H4E	NFASC	ADIPOQ	CDK17	NUDT18	TMEM170B	RWDD4	FXR1
USP37	DNAJC21	PIM3	GJA9	TMPRSS11B	TMEM2	SCD5	GABRA5
ARMCX2	PPARGC1B	C11orf44	PRICKLE2	TBX3	TMEM248	SCHIP1	GABRB1
SAPCD1	TMEM120B	ST6GALNAC1	AEBP2	LIN54	TNFAIP3	SFPQ	GALNT1
FLJ20306	SPTBN2	ZNF667	GSTO2	RNF182	TRAPPC8	SIAH1	GALNT3
APOL3	AIRE	ZNF552	MLLT6	NCDN	TRIB2	SIK1	GALNT7
PRNP	KIAA1462	LRRC32	SESTD1	LEMD2	TRIM2	SIRT1	GALR1
RYR3	DLG3	SEMA3F	GPR22	HCFC1	TRIOBP	SLC18A2	GATA5
GPC5	BAZ2B	PRRX2	UBR5	ZNF282	TRPC4	SLC20A1	GATM
AGBL3	SLC24A3	WASF3	SP1	FMO2	TTPAL	SLC25A3	GCLC
ELL3	BYSL	CECR5	PGM3	GYG2	TWF1	SLC35C1	GFPT2
PIN4	SNX30	ZNF37A	PDE4B	FAM114A1	UBE2Z	SLC35D1	GJA1
PCNP	ACAP2	PTPN20A	ZDHHC17	FUT9	UBTD2	SLC6A5	GLCCI1
FA2H	ERBB4	HTATIP2	NFAT5	PITPNC1	UNG	SLMO2	GLDC
MTAP	JAKMIP2	SEPT3	CDH1	TMEM138	USP24	SNX18	GLUD1
SLC35F3	BRSK1	CHRNA10	SMC2	PPP4R1L	VAT1L	SOBP	GLUD2
SBNO1	JOSD1	PTPN20B	ERBB4	ST3GAL1	VMA21	SOX17	GMNC
ANKRD49	PCDH17	TMEM184A	TET3	EGLN1	XYLT1	SPDL1	GNA13
YPEL5	MAPRE1	ZMAT4	TMEM64	MYO1H	XYLT2	SRC	GNAI2
PANK3	BLCAP	C10orf129	GCOM1	AC092850.1	ZBTB4	SRM	GNAO1
KIAA1324L	ZNF695	PSTK	DDX52	CIB1	ZBTB47	ST3GAL3	GNG10
RAB11A	CAPZB	SORBS2	ENTPD7	CECR1	ZCCHC24	ST3GAL5	GNPDA1
DHFRL1	KCNK5	CTD-2117L12.1	ULK2	GRIA1	ZCCHC3	STAG1	GOLGA1
BPGM	ANXA11	ZNF322	ST6GAL2	TIFAB	ZCCHC4	STAT4	GOLGA4
TMPRSS11D	SLC7A6OS	N4BP2L2	SAMD12	ZNF418	ZFP36L1	STAT5A	GPR150
ZNF239	PRDM6	BCL7B	XKR7	ACBD3	ZFP62	STX2	GPR75-ASB3
PAGE5	HAP1	ZNF720	WASF2	DNAJC4	ZNF367	TADA1	GRAMD2
ATG12	CENPP	DNAJC9	SH3BGRL2	AC079210.1	AC140061.12	TCERG1	GRB10
RANBP3L	KCND3	BRD9	TMEM178B	MED14	AC137932.1	TFAP2C	GRIA2
ARF6	RUNX1T1	BOK	GTF2E1	MEX3B	TAOK1	TFRC	GSKIP
C1orf101	SYNGAP1	N4BP3	LRIG2	TANC1	CHRM3	TGFB2	GTF2H1
ISL1	ZBTB7B	DOLPP1	PBX1	TSTD2	ZNF704	TMED9	HEPHL1
SIAH1	PCDH1	MAP3K11	KLHL18	PAX2	CAMKK2	TMEM110	HIVEP1
SERBP1	SESN3	ARSI	NFIA	SRL	TPM3	TMEM135	HLF
GTF2H3	HSD17B8	TMCO5A	KPNA4	MICAL2	KDM2A	TMEM170B	HLX
TP53RK	KIF1B	FFAR2	LARP4B	PSMG4	TNRC6B	TMEM216	HMGB3
MEAF6	CDK13	FAM120A	RANBP17	STK40	KLF7	TMEM56	HOXA1
CAMK2G	CNNM2	C19orf54	CREBBP	ST6GALNAC6	PLXNC1	TMEM70	HOXA11
PPP1R9A	FAM3A	PYGO2	HMGCR	PDPR	HOMER1	TNFAIP3	HOXB8
TADA1	BCLAF1	GPAT2	ZMYM4	KDM8	YPEL5	TNKS2	HTRA3
ZBTB38	POMT2	BTBD17	SYNCRIP	AC093802.1	DUSP16	TP53INP1	IDH1
CEP170	TPRG1	PGAM1	UBE2V2	ST13	C1orf21	TRHDE	IER5
SH3GLB1	RP11-343C2.12	ADAMTS13	ANKFY1	KCNE4	FBXO28	TRIM23	IL1RAPL2
HIPK1	PDF	SPACA7	SCAI	SEC14L2	WNT8B	TSC1	ING5
ZNF257	NDUFB9	GDF9	TGFB2	SLC6A1	EHMT1	TSPAN4	INO80D
ZNF22	CTNNBL1	CST9	IPO9	MGAT5	RCOR1	TTLL7	INSIG2
CHRM2	ATG7	SCAND1	ARHGAP20	MAN2B2	FOSL2	TTR	IP6K3
ZNF24	LIG3	YAP1	ZBTB38	ZNF736	SNRK	UGT1A1	IQCG
ZNF782	PPP6R2	ESR2	RBMX	VENTX	DOCK4	UGT1A10	IRX4
MOSPD2	COG8	TAGLN2	CISD1	MYO19	ATM	UGT1A3	ITGA4
C1orf192	SLC14A2	SH2D1B	GLIPR1	COG3	PHF15	UGT1A4	ITGA6
PHLDA1	POLR2H	KRT35	INO80D	SGSM1	LPP	UGT1A5	ITGA8
CLASP2		TSSK6	CFL2	AMT	ATXN1	UGT1A6	ITSN1
PTEN		CCDC142	LPPR5	DRGX	TENM3	UGT1A7	JAK1
ZNF267		UBE2R2	BRSK2	BEND3	CNR1	UGT1A8	JAKMIP2
CCDC18		TFR2	EPB41	SLC48A1	FZD3	UGT1A9	JARID2
MS4A12		ITIH4	MAP2	EBF1	SLC35A3	ULK2	JDP2
HSPE1		TAF1L	TMEM106B	GAN	ATP8A1	URGCP	JPH4
BDNF		NUCB1	TRIM44	ZNF594	ZFP69B	VSIG8	KCNA4
PAGE2B		MLLT6	AAK1	DDI2	SLC12A6	WTAP	KCTD8
EP400NL		MOB3C	MYH9	ZNF275	MFRP	YAF2	KDM3A
HOMER2		MICA	TSC1	ABHD17A	ORC2	YPEL5	KIAA0101
TTC33		C5orf27	ETV3	SNX1	RTN2	YTHDF2	KIAA0226L
ZBED6CL		GP1BA	TIMP4	DSP	SLC2A13	YWHAG	KIAA2026
PMEL		NAA10	ACAP2	TSPAN14	DPP10	YY1	KLF10
GPRASP2		EFEMP2	PPM1D	NF1	ZC3H12C	ZCCHC24	KLF11
RBM45		CXCL13	UHRF1BP1L	RNF8	LIN28A	ZEB1	KLHL20
HOXB7		DCAF4L1	ZHX3	PDGFRA	MTF1	ZFAND5	KMT2C
AZI2		ABR	NEBL	PPP2R2C	UBE2G1	ZFR	KXD1
SIGLEC12		TRMT10B	HCFC2	CERS1	SH3KBP1	ZMPSTE24	LARGE
TNIK		LIN28B	DDX3X	USP40	NACC2	ZNF385D	LCLAT1
HS3ST5		TBL1X	IPO7	CHST15	STRIP2	ZNHIT3	LGI1
CAPNS2		PACSIN1	RAP2A	PLEKHM1	DAB1	RFX7	LHX5
RAB3IP		PBXIP1	GINS2	NRGN	GINS2	EXOC5	LHX8
NAP1L3		TSFM	KDELC2	RPS6KA2	ONECUT1	STX16	LIN28A
AC110619.2		WBP1L	DCUN1D3	TMEM178B	NREP	PPM1L	LIN28B
PAGE2		SLC46A3	KIF5A	FLJ27365	MYO1C	MN1	LIN7C
TBC1D31		AC002472.13	SLC16A10	IDS	ANKRD13C	MMP16	LMBR1L
ACYP2		ADRA2B	DIAPH2	MVD	SATB1	ZNF281	LRFN2
DGCR6		SLC35F2	NHS	PHC1	MRPL27	RAB5A	LRRC17
PDE5A		CCL4L2	CTNND1	MIB2	PAPPA	SLC17A6	LRRC8D
CTNNA3		SLC39A8	VEZF1	MAGT1	CEP85L	FBXW2	LSM14B
MEOX2		PGAM4	RPP25	RGS9BP	ANKRD50	SREK1IP1	LYN
DCTN4		CPLX2	CTBS	CNNM3	GNAS	FAM160B1	LYSMD3
BEND6		SLC6A15	ADAT2	GFRA3	PHC3	RYBP	MAB21L1
SMCO3		GPX3	CBFA2T2	ACTR1A	EPB41L1	SPAG9	MAML1
EPS8		PPARD	ARHGEF12	CABLES2	ZNF394	LYPD6	MAN1A2
SNAI2		SERTM1	ATP6V0A2	DNAJB1	EPHA7	UBASH3B	MAP3K12
PGAP3		IPO4	LNPEP	RPRD1B	SIM2	LUC7L3	MAP3K5
HNF4G		KIF7	THAP1	DPP6	NOTCH2	RFX1	MBNL3
LAP3		RSPO4	SPRY1	ZG16	SGPL1	PAPOLG	MBOAT1
RNF6		TEX261	LYPD6	KIAA0430	SON	KCTD12	MBTPS2
VWA9		COLQ	ALDH1L2	RIN2	SLC6A6	NAP1L1	METAP2
TMEM100		TNNI1	DNMT3A	TWSG1	UBP1	CYP26B1	MEX3B
TRIM60		RGS16	ERCC6	HADH	SULT4A1	PAX3	MFSD11
CALM1		LMAN2L	DYRK3	PTGDR2	FAF1	GATA3	MIA3
MAGOHB		SMYD5	KIAA1549L	CCDC180	KIF3B	PRDM10	MICAL1
TOMM20		ADAD2	TMEM184A	PCDHGB4	GLG1	CDV3	MINOS1
CPNE4		DPM2	AGO1	PCDHGB1	PURB	HMGB1	MINPP1
ZNF750		ZNF517	ZNF704	PCDHGA5	ACACB	SERINC1	MKRN3
NDUFA4		DCTN5	UBE2H	PCDHGA9	KCTD16	PDXP	MMD
MAP10		MRFAP1L1	ZNF507	PCDHGA2	ENDOD1	OSBPL1A	MOV10
RPGR		DPYSL3	GPHN	PCDHGA8	WNT9A	MMP24	MSANTD3-TMEFF1
AKT3		NMNAT3	EIF4E	PCDHGA3	ANKRD52	ZNF660	MSANTD4
RP11-187E13.2		OGG1	RNF8	PCDHGA7	NAV1	AMOTL1	MTDH
CTD-2370N5.3		TNFRSF10D	SREK1	PCDHGA12	SAR1A	GJC1	MYBL2
HS3ST1		LCOR	ROCK1	PCDHGA1	CCDC88A	PLAGL2	MZT1
UBE2K		SLC22A18AS	WDR12	PCDHGA4	RIMKLA	MATR3	NAALADL2
B9D1		IFRG15	MEX3A	PCDHGB7	VPS13B	SNAP91	NAGPA
CHRM3		TRIM56	FAM213A	PCDHGB3	CBX5	RSPO3	NDEL1
PRLR		UBR2	PRUNE2	PCDHGC3	CLCN4	ATAD2B	NECAP1
ANXA1		NCF1	ACADSB	PCDHGB2	POU2F1	PAPLN	NEFM
AC112693.2		EFHD2	KCNN1	PCDHGB6	NRG2	SLC1A1	NEUROD1
LTF		LPL	KCMF1	PCDHGA6	SOX6	PHF21A	NEUROD6
CXorf48		MYCN	SLC25A12	KDSR	MARCH5	RASA2	NHLH2
ARPC1A		RPL12	RASSF9	PCDHGC4	JMY	BEND4	NKAIN2
MCCC2		DCAKD	WDR41	C9orf69	UHMK1	CGGBP1	NKX2-2
RALA		GAB3	ZBTB24	PCDHGA10	NEO1	ZDHHC7	NR4A2
C1GALT1		PCTP	MECP2	PCDHGC5	FGF1	TNPO1	NRBF2
RBM7		RP11-382J12.1	GID4	PTPN11	PNISR	BRWD1	NRBP1
CUL5		MOG	ATL3	CD276	FAM136A	IFNAR1	NRXN3
PHACTR2		CCL14	SETD9	GPR156	KIAA0232	ATP6V1C2	NUS1
PLAC8		GP6	IGSF10	ATCAY	ADAT2	PLCXD3	OMG
CD200R1		PIK3CD	ALG9	EOGT	FAM192A	ARHGAP23	ORC2
DNAJB4		TMEM75	PDE7A	BCLAF1	NCOA2	KIF3A	OVOL1
WDR78		GID8	EXD2	SRRM3	CDH6	TRAPPC8	OXR1
TEX9		KBTBD11	C15orf61	PCDHGA11	KCMF1	OGT	P4HA1
RAB39B		SMTN	GTDC1	STX3	TENM4	FAM168A	P4HA2
NAV3		PSENEN	TENM4	HPS4	BRWD1	CAMSAP2	PAAF1
GPR135		RALB	AGPS	PCGF3	ZNF618	UBA6	PAPD4
FBLN7		DND1	AHSA2	ZNF365	ZNF280C	NIPBL	PARP16
IGJ		MTF2	CMC1	SIDT2	ROBO2	ZBTB46	PBRM1
AP003733.1		LPCAT1	MRPS23	KIAA1549L	GAB2	ABCE1	PCDH20
AASDHPPT		DUS1L	TGFB1	TCEANC2	ANK3	CELF6	PCGF5
EGR1		DDX31	MEF2D	RCOR1	NFAT5	UBE2V2	PDCD10
SS18		ZBTB42	TFG	NKD1	NUFIP2	HIPK1	PDCL
TMEM87A		LIN54	QSOX1	UQCC1	GDF5OS	ZNF436	PDE5A
RAB8B		ZBTB47	DCUN1D5	USP11	DICER1	KLF3	PDE7A
HDX		AC040160.1	PSMD1	PRKCB	VSTM4	GIGYF1	PDSS1
DEFB118		RMDN3	GHSR	AGGF1	ZBTB44	SOX6	PEX5L
GBAS		SYT13	CSMD1	STARD7	PPP6C	AKAP11	PFN2
HBEGF		BLOC1S6	TGFBR2	SDK1	C14orf166	RAPGEF2	PGM1
ADH7		GRAMD2		MED22	SMG1	TREH	PGM3
KLK10		KIAA1407		CALN1	LNPEP	MAPK1	PGP
CHCHD4		KIAA0141		PI4K2A	SIK3	ATF7IP	PHACTR2
GK5		CDS1		SFXN3	YWHAB	CBX5	PI4K2B
PECR		GSG1L		S1PR2	RASAL2	MED13L	PICALM
ABHD5		CHCHD6		FER	MEF2D	HNMT	PIGA
MMP27		IGFBP4		DNAJC27	CCDC171	IDE	PIGX
AP4E1		ARF5		F11R	CDS2	SOX5	PIP4K2A
HIST1H2AC		TPPP		CD302	SLC35E1	FZD4	PIP4K2B
TMEM54		IDH3G		PITX1	ZBTB20	VCAN	POLE3
RALB		AP5Z1		SEL1L3	HCN4	NPC1	POLR3G
APOL4		KIRREL3		ADAM12	GPSM2	NABP1	PON2
LHFPL3		PSG5		XYLT1	UQCRB	JMJD1C	POP1
GPATCH11		BRD4			PTPMT1	TCF21	PPID
GORAB		CLUH			FUBP1		PPIL3
KLHL2		HN1L			GTDC1		PPP1R14C
PGA5		NFAM1			CLCC1		PPP3CA
HESX1		BOD1L2			GRWD1		PPTC7
HLA-DPB1		C2orf91			ISL2		PRDM1
NECAP2		SLC5A2			FAM166B		PRKRIR
CCL13		HOXC8			PHAX		PRPF40A
HUS1		COPS8			RNF19B		PSEN2
DNAH5		FADS6			COLEC10		PSMD7
ITGAV		ZGLP1					PTP4A1
C2orf88		RIN1					PTPN13
NUP35		ZNF707					PVRL3
ADAT2		RARG					R3HDM1
OIT3		TSSC4					RAB15
ZBTB25		MICU1					RAB22A
ANP32E		COG5					RAB27B
ACSL4		CD40LG					RAB32
PRPH2		MAPKAPK3					RAB38
ELK3		NADK					RAB4B
ATG2B		FAM106A					RAB7A
HIGD2B		TPD52L3					RAB8A
PMCH		C1orf115					RABGAP1L
FAM89A		IQCE					RAD23B
TRMT10B		THRSP					RALGDS
SUCLG2		P2RX1					RANBP9
C1ORF220		LRRC3					RAP1B
TGFA		FLVCR2					RAP2B
CDC73		FHL1					RAPGEF4
KRTAP19-5		DUSP13					RARB
MGME1		WDFY1					RARG
LARP6		ORAI2					RASA1
KLHDC1		TMIE					RASD1
SAMD12		CNTFR					RASEF
AS3MT		TOMM40L					RCBTB1
CCL18		AURKA					REEP3
CNKSR2		SLC16A8					REV1
DBX2		SP6					RFTN2
SYT11		CD4					RFX2
PLS3		SPSB3					RFX6
NMT1		SLC25A27					RHEBL1
SAMD7		PICK1					RNF122
RSPO2		SLC41A3					RNF157
FGF7		AL117190.3					RNF220
GALNT1		FCF1					RNF34
HSPD1		C3orf83					RPRD1A
TEX30		HSPB8					RRAD
CAV1		C1orf143					RTCB
MYO5A		CTU1					RTN4R
VWC2L		HHLA2					RUNDC3B
CYP4F31P		UNC13C					RUNX2
CAP2		ARX					RWDD4
PRKAA2		CES1					SCAF4
SEPW1		KLKB1					SCN1A
CCDC74A		MRPL10					SCN9A
SLC12A1		C9orf139					SCYL3
ANKRD12		CMPK1					SDAD1
KYNU		CNRIP1					SEC22C
METTL2B		GAA					SEC23A
CCDC163P		VIPR1					SEC61A2
CCDC88A		LMX1B					SEMA3A
GPR75		KLHDC10					SEMA6B
IZUMO3		TOX4					SEPT7
ASPHD1		C2CD2L					SETD3
MAGEE1		CCL4L1					SH2B3
MRPL30		CRTC2					SH3RF1
THPO		CDK18					SHOC2
ST6GALNAC3		EIF4G2					SIX1
DYNLL1		PEX6					SIX4
C4orf33		DOK4					SKP2
ABHD3		CDX2					SLC22A5
C1orf220		TSSK1B					SLC25A34
COX5A		WASF2					SLC29A3
CCKBR		NOSTRIN					SLC35A5
RNF146		JMJD7					SLC35B4
HSPH1		GJA3					SLC35D3
POU4F1		C10orf91					SLC35F1
USP1		PHF19					SLC35F4
LRPPRC		OPN4					SLC41A2
LIN9		APOF					SLC5A11
MAPK13		HIST1H2AK					SLC6A9
DMRT1		SAMD11					SLC7A10
FAM182B		ITPRIP					SMAD1
MPP6		LRRC14B					SMAP1
DTD1		TFEC					SMIM14
AC137056.1		C9orf78					SNAI1
FAM13B		PRTN3					SNAPIN
HMGA2		GPD2					SNX10
ZBTB41		GTDC1					SNX16
C2orf15		OVOL1					SOCS1
ZBTB37		PRKCA					SOCS3
TMEM232		SMKR1					SOCS6
ZBTB21		DKFZP434E1119					SOX4
NSL1		ASPN					SOX9
OIP5		SUSD5					SPHKAP
MKNK1		CALHM1					SRSF7
RRH		NAGA					SSR3
NKRF		SLC2A1					STAC
C10orf107		DIRAS1					STK39
MYBL1		NR1H2					STRIP1
PRG4		POU2AF1					STX2
ZRANB3		TYR					SUCLG2
C3orf67		TSTD2					SURF4
COMMD7		KIAA0247					SYNGR3
AJUBA		GOLGA6L2					TAF4B
ARV1		KIAA0087					TASP1
C5orf30		CPXM2					TBC1D10B
C10orf40		TOE1					TBPL1
PNMAL1		RAB11FIP1					TCF7
METTL2A		ZNF587B					TEX2
NEGR1		GCNT2					TFDP1
RPE65		CD7					TIA1
TCEB1		PIP5KL1					TMCC1
NABP1		SCIMP					TMED2
C10orf126		PKIB					TMEFF1
APOL6		TYW1B					TMEM106B
KRT6C		PGF					TMEM121
FBXO40		PSTPIP1					TMEM170B
C9orf78		CEP85					TMEM181
GVQW1		SETDB1					TMEM229A
SELT		PHYHIP					TMEM87A
DNM1L		USP24					TMTC3
ARHGAP28		BAIAP2					TNRC6A
DOK6							TRAF3IP2
FAM169B							TRIM23
STX12							TRO
HMGB1							TRPM7
CREB1							TTC39A
KCTD4							TTLL7
ROR1							TTPA
DEPDC1B							TUSC3
NUP62CL							TVP23B
C17orf100							TWF1
HOXA13							TXNDC5
BCL2L13							UBAC1
HADHB							UBE2D2
DYDC2							UBE2D3
ZNF426							UBE2F
CNFN							UBE2I
RP3-369A17.5							UBE2J1
KDELC2							UBE2V2
ZFAND5							UBE3C
TBC1D23							UCP3
C11orf53							USP2
LRRC70							USP45
MKL2							USP48
PIGY							VAPA
TMEM144							VAT1L
EPO							VIM
PTGR2							VIP
KRTAP20-2							VKORC1L1
IMPG1							VOPP1
SLFN12L							VPS26B
PPHLN1							WDR44
MDP1							WDR82
GMEB1							WWP1
DAO							YBX1
C12orf73							YOD1
HIST1H2BH							YPEL2
TTC32							YPEL5
ZNF692							YTHDC1
ZNF430							YWHAZ
DFNA5							ZBTB11
CHUK							ZBTB18
RBM28							ZDHHC21
TSPAN2							ZFAND5
NCKIPSD							ZFC3H1
IPO5							ZNF200
DHFR							ZNF280B
KHSRP							ZNF382
HTN3							ZNF521
BRMS1L							ZNF608
FLRT3							ZNF711
RNF19B							ZNRF1
FER							ZPBP2
NCKAP1							STOX2
SEMA3E							RORA
PA2G4							KLHL28
SLC25A30							GAN
RELT							NFIB
TMEM140							ZDHHC20
FARP1							SRSF10
TRIM72							MIER3
ZDHHC21							SCN2A
DNAJC28							AC104472.1
ANAPC10							RP11-160N1.10
GBP1							FZD3
CHURC1							RP11-497E19.2
ZNF397							PPP1R2
NT5C1B							RP6-24A23.6
CKS1B							LHX9
OLA1							STIM2
RIPPLY1							PPARGC1A
ZCCHC14							PPP1R18
UBE2D3							PLAGL2
ITGB6							WNK3
TMEM258							PCGF3
COLCA1							FLJ20373
CAPS							NEDD4
NT5C1B-RDH14							MAP3K2
OSBPL1A							ZBTB41
ADAM7							AVEN
CCDC91							ANKHD1
SLC1A3							S100PBP
SPPL3							LHX1
CENPK							PABPC1L2B
LPGAT1							PPARGC1B
ATP11C							SNX18
PITX2							ADAMTS3
TRMT61B							DCUN1D3
GJA1							RAP2C
ITPR2							CELSR3
FBXO33							MBNL1
PCSK5							RGS17
RGS2							FRMD6
DERL2							EPDR1
PDZD8							PABPC1L2A
DNAJC21							AC012215.1
ATP12A							FRMPD1
GABRG2							AP4E1
CDS1							RAB3D
MOB1A							ANO4
RNF141							YAF2
IL22RA2							BDP1
GPR39							DCUN1D1
MAPRE2							SLC35F3
C5orf24							GNAQ
LMO3							CBFB
DRGX							FAM109A
MORC1							SOS1
TMEM154							LONRF1
SELL							ZCCHC2
SMG1							SAP30
UEVLD							KLF9
RPL39							EML1
PSG1							PRRG1
KIF4A							CLRN1
RPL37							LCOR
SMLR1							GPR125
PRKAB2							PPAPDC2
SCD5							MLK4
CCR7							XPO1
NODAL							DGKH
ZNF667							CCDC97
FAM120C							GRHL2
AMBN							WDR7
PBLD							N4BP2
SMIM15							OSTM1
IMPA1							FLVCR1
C10orf55							KCTD16
ASAP2
HIPK3
RGS10
LHX9
CHMP1B
EXTL2
CLVS1
SHCBP1L
NUMB
LSS
SRGN
ZNF99
MCEE
TAS2R5
TRIQK
RABGAP1L
ADORA2B
HTR2C
CENPL
FAM98A
MNT
RAB2B
NPPA
MAP3K4
TEX26
EGLN1
